# Supplementary material
Source: PubMed Central journal article supplement (PMC8733787)
Supplement: mmc1.pdf [file mmc1.pdf]

**Supplemental information**

**mRNA-based COVID-19 vaccine**

**boosters induce neutralizing immunity**

**against SARS-CoV-2 Omicron variant**

**Wilfredo F. Garcia-Beltran, Kerri J. St. Denis, Angelique Hoelzemer, Evan C. Lam, Adam D. Nitido, Maegan L. Sheehan, Cristhian Berrios, Onosereme Ofoman, Christina C. Chang, Blake M. Hauser, Jared Feldman, Alex L. Roederer, David J. Gregory, Mark C. Poznansky, Aaron G. Schmidt, A. John Iafrate, Vivek Naranbhai, and Alejandro B. Balazs**

**Table S1**

| Vaccinee cohort                      | recent vaccination<br>(<3 months) | distant vaccination<br>(6-12 months) | distant vaccination<br>+ infection | booster vaccination<br>(<3 months) |
|--------------------------------------|-----------------------------------|--------------------------------------|------------------------------------|------------------------------------|
| <b>Total (n)</b>                     | <b>65</b>                         | <b>62</b>                            | <b>41</b>                          | <b>71</b>                          |
| <b>Demographics</b>                  |                                   |                                      |                                    |                                    |
| Age (y) (median, range)              | 39 (24 – 72)                      | 41 (18 – 71)                         | 46 (22 – 78)                       | 34 (22 – 76)                       |
| Sex (% female)                       | 43/65 (66%)                       | 40/62 (65%)                          | 26/41 (63%)                        | 41/71 (58%)                        |
| Community cohort (%)                 | 20/65 (31%)                       | 40/62 (65%)                          | 33/41 (80%)                        | 11/71 (15%)                        |
| Healthcare worker cohort (%)         | 45/65 (69%)                       | 22/62 (35%)                          | 8/41 (20%)                         | 60/71 (85%)                        |
| Days since last dose (median, range) | 17 (7 – 82)                       | 244 (181 – 321)                      | 229 (130 – 302)                    | 31 (7 – 118)                       |
| <b>mRNA-1273 (Moderna)</b>           |                                   |                                      |                                    |                                    |
| <b>Total (n)</b>                     | <b>24</b>                         | <b>23</b>                            | <b>8</b>                           | <b>33</b>                          |
| Age (y) (median, range)              | 54 (24 – 72)                      | 39 (23 – 65)                         | 36 (22 – 56)                       | 35 (23 – 74)                       |
| Sex (female, %)                      | 17/24 (71%)                       | 16/23 (70%)                          | 3/8 (38%)                          | 17/33 (52%)                        |
| Community cohort (%)                 | 0/24 (0%)                         | 9/23 (39%)                           | 4/8 (50%)                          | 3/33 (9%)                          |
| Healthcare worker cohort (%)         | 24/24 (100%)                      | 14/23 (61%)                          | 4/8 (50%)                          | 30/33 (91%)                        |
| Days since last dose (median, range) | 18 (7 – 60)                       | 291 (181 – 315)                      | 243 (130 – 302)                    | 21 (7 – 82)                        |
| Cross-over vaccination regimen (%)   | n.a.                              | n.a.                                 | n.a.                               | 1/33 (3%)                          |
| <b>BNT162b2 (Pfizer)</b>             |                                   |                                      |                                    |                                    |
| <b>Total (n)</b>                     | <b>21</b>                         | <b>33</b>                            | <b>27</b>                          | <b>30</b>                          |
| Age (y) (median, range)              | 32 (25 – 65)                      | 43 (18 – 71)                         | 47 (22 – 78)                       | 33 (22 – 76)                       |
| Sex (female, %)                      | 13/21 (62%)                       | 22/33 (67%)                          | 18/27 (67%)                        | 19/30 (63%)                        |
| Community cohort (%)                 | 0/21 (0%)                         | 25/33 (76%)                          | 24/27 (89%)                        | 4/30 (13%)                         |
| Healthcare worker cohort (%)         | 21/21 (100%)                      | 8/33 (24%)                           | 3/27 (11%)                         | 26/30 (87%)                        |
| Days since last dose (median, range) | 13 (7 – 32)                       | 224 (186 – 321)                      | 217 (180 – 300)                    | 49 (10 – 84)                       |
| Cross-over vaccination regimen (%)   | n.a.                              | n.a.                                 | n.a.                               | 6/30 (20%)                         |
| <b>Ad26.COVS.S (Janssen)</b>         |                                   |                                      |                                    |                                    |
| <b>Total (n)</b>                     | <b>20</b>                         | <b>6</b>                             | <b>6</b>                           | <b>8</b>                           |
| Age (y) (median, range)              | 46 (24 – 67)                      | 52 (34 – 71)                         | 44 (35 – 68)                       | 32 (23 – 37)                       |
| Sex (female, %)                      | 13/20 (65%)                       | 2/6 (33%)                            | 5/6 (83%)                          | 5/8 (63%)                          |
| Community cohort (%)                 | 20/20 (100%)                      | 6/6 (100%)                           | 5/6 (83%)                          | 4/8 (50%)                          |
| Healthcare worker cohort (%)         | 0/20 (0%)                         | 0/6 (0%)                             | 1/6 (17%)                          | 4/8 (50%)                          |
| Days since last dose (median, range) | 50 (11 – 82)                      | 249 (184 – 269)                      | 247 (233 – 266)                    | 39 (20 – 118)                      |
| Cross-over vaccination regimen (%)   | n.a.                              | n.a.                                 | n.a.                               | 7/8 (88%)                          |

**Table S1. Clinical data from vaccinee cohorts, related to Figure 2. Clinical data is shown for each pre-defined cohort.**
